# Supplementary material
Source: PubMed Central journal article supplement (PMC5798370)
Supplement: pnas.1717603115.sapp.pdf [file pnas.1717603115.sapp.pdf]

# Supporting Information Appendix

Feng et al. 10.1073/pnas.1717603115

## Additional Analyses and Results

### **Classification of Participants into CI vs. NH group.**

To provide additional evidence supporting the validity of the affected and unaffected brain templates, we conducted a classification analysis with a linear SVM classifier to classify participants into different groups (CI vs. NH Group). We used a 10-fold cross-validation procedure with a feature selection approach (two-sample *t*-tests, approximately 5% of the total voxels were selected on each training set). By using this procedure, we consistently achieved high classification accuracy across tissue types and measures (GM MVPS: 95.9%, WM MVPS: 97.3%, GM density: 97.3%, WM density: 91.9%). The affected brain areas identified by this classification procedure are largely overlapping with those determined by the univariate group comparisons (see SI Appendix, Fig. S6).

**Sex-balanced Cross-validation Procedures.** Our 37 children who use CIs consisted of 18 females and 19 males. In the leave-one-participant-out cross-validation (CV) procedure, each participant was treated as a test set once. In this situation, there was no sex bias because each patient would be a testing set. In the 10-fold CV procedure, we randomly selected 90% of the participants (33 out of 37) for training and 10% of the participants (4 out of 37) for testing. For each fold of the CV, we ensured the sex ratio in the testing set was 1:1 (i.e., 2 males and 2 females). Therefore, the sex ratio in the training set was 0.94:1 (16/17) while the testing set was 1:1

(2/2). In other words, there was a slight difference in sex ratio between the training and testing sets. To ensure this was not a confounding factor in our analysis, we used a sex-balanced CV in another classification analysis with 10,000-iteration bootstrapping. We randomly selected 32 participants for training while ensuring that the sex ratio was 1:1 (i.e., 16:16) and the remaining 2 females and 2 male participants for testing in each CV fold. We found that this sex-balanced CV procedure yielded very similar classification performance as those reported in the main text (median of the classification accuracies: GM MVPS: 76%, WM MVPS: 81%, GM density: 53%, WM density: 48%). These results confirmed that the slight difference in sex ratio between the training and testing set did not affect our results.

### **The Relationship between Duration of Hearing-aid Use and Brain reorganization.**

To further examine whether duration of hearing-aid use (the time between hearing-aid fitting and MRI scan) was correlated with those neuroanatomical measures (both GM density and similarity), we conducted group-level regression analyses while controlling for effects of other non-neural variables (i.e., age of implant, sex, and SES). No significant correlation between duration of hearing-aid use and any brain measures in the auditory cortices was found. This is true even after a less conservative threshold was used (e.g., uncorrected voxel-level  $P = 0.01$ ).

**Table S1.** Brain regions in gray matter that showed significant differences in VBM density and MVPS measures between children in the CI and NH groups.

| Regions                     | BA | MNI |      |     | Peak<br><i>t</i> -value | Number of<br>voxels | Direction |
|-----------------------------|----|-----|------|-----|-------------------------|---------------------|-----------|
|                             |    | x   | y    | z   |                         |                     |           |
| <b>GM MVPS</b>              |    |     |      |     |                         |                     |           |
| L. Superior Frontal Gyrus   | 8  | -24 | 18   | 58  | 5.02                    | 172                 | WN>BW     |
| L. Inferior Frontal Gyrus   | 47 | -36 | 20   | -10 | 5.68                    | 126                 | WN>BW     |
| L. Superior Temporal Gyrus  | 21 | -66 | -14  | -12 | 6.78                    | 387                 | WN>BW     |
| L. Medial Frontal Gyrus     | 11 | -2  | 52   | -10 | 6.00                    | 278                 | WN>BW     |
| L. Middle Cingulate Gyrus   | 31 | 0   | -26  | 42  | 7.06                    | 418                 | WN>BW     |
| R. Middle Frontal Gyrus     | 6  | 50  | -4   | 46  | 5.82                    | 235                 | WN>BW     |
| R. Superior Temporal Gyrus  | 22 | 50  | 0    | 2   | 7.13                    | 432                 | WN>BW     |
| R. Middle Temporal Pole     | 21 | 62  | -4   | -14 | 6.31                    | 144                 | WN>BW     |
| R. Precuneus                | 7  | 4   | -66  | 12  | 7.45                    | 588                 | WN>BW     |
| <b>GM Density</b>           |    |     |      |     |                         |                     |           |
| L. Superior Temporal Gyrus  | 22 | -56 | 4    | 0   | 5.65                    | 122                 | NH > CI   |
| L. Heschl Gyrus             | 13 | -46 | -30  | 16  | 4.95                    | 149                 | NH > CI   |
| L. Medial Frontal Gyrus     | 32 | -8  | 48   | 2   | 5.95                    | 238                 | NH > CI   |
| L. Precuneus                | 31 | -6  | -24  | 46  | 6.55                    | 255                 | NH > CI   |
| L. Lingual Gyrus            | 18 | -16 | -102 | -16 | 8.10                    | 150                 | NH > CI   |
| L. Parahippocampa Gyrus     | -  | -26 | -42  | -2  | 6.10                    | 111                 | NH > CI   |
| R. Superior Temporal Gyrus  | 22 | 56  | 4    | 0   | 6.67                    | 272                 | NH > CI   |
| R. Heschl Gyrus             | 13 | 32  | -22  | 18  | 5.20                    | 117                 | NH > CI   |
| R. SupraMarginal Gyrus      | 3  | 32  | -36  | 46  | 5.24                    | 197                 | NH > CI   |
| R. Middle Cingulate Gyrus   | 31 | 6   | -24  | 48  | 6.82                    | 188                 | NH > CI   |
| R. Superior Occipital Gyrus | 19 | 28  | -70  | 32  | 5.13                    | 345                 | NH > CI   |
| R. Parahippocampal Gyrus    | -  | 32  | -36  | -6  | 6.53                    | 124                 | NH > CI   |

Note. L = left hemisphere; R = right hemisphere; WN = within-NH-group MVPS; BW = between-group MVPS.

**Table S2.** Statistical comparisons between each pair of classification models in classification accuracy made by using permutation tests and bootstrapping procedures.

| Features                                                     | Compared with<br>with<br><b>permutation-<br/>based null<br/>distribution</b> | Compared with<br>bootstrapping-based<br><b>non-neural-measure<br/>classification<br/>accuracy distribution</b> | Compared with<br>bootstrapping-based<br><b>affected-brain-area<br/>classification<br/>accuracy distribution</b> | Compared with<br>bootstrapping-based<br><b>unaffected-brain-area<br/>classification accuracy<br/>distribution</b> |
|--------------------------------------------------------------|------------------------------------------------------------------------------|----------------------------------------------------------------------------------------------------------------|-----------------------------------------------------------------------------------------------------------------|-------------------------------------------------------------------------------------------------------------------|
| Demographic<br>variables<br>+ pre-CI SAT and<br>pre-CI SRI-Q | $P = .525$                                                                   | -                                                                                                              | -                                                                                                               | -                                                                                                                 |
| <b>GM MVPS</b>                                               |                                                                              |                                                                                                                |                                                                                                                 |                                                                                                                   |
| <i>Affected</i>                                              | $P = .549$                                                                   | .547                                                                                                           | -                                                                                                               | -                                                                                                                 |
| <i>Unaffected</i>                                            | $P = .008$                                                                   | < .001                                                                                                         | < .001                                                                                                          | -                                                                                                                 |
| <i>Whole-brain</i>                                           | $P = .008$                                                                   | < .001                                                                                                         | < .001                                                                                                          | .731                                                                                                              |
| <b>WM MVPS</b>                                               |                                                                              |                                                                                                                |                                                                                                                 |                                                                                                                   |
| <i>Affected</i>                                              | $P = .046$                                                                   | < .001                                                                                                         | -                                                                                                               | -                                                                                                                 |
| <i>Unaffected</i>                                            | $P = .002$                                                                   | < .001                                                                                                         | .004                                                                                                            | -                                                                                                                 |
| <i>Whole-brain</i>                                           | $P = .004$                                                                   | < .001                                                                                                         | .028                                                                                                            | .718                                                                                                              |
| <b>GM Density</b>                                            |                                                                              |                                                                                                                |                                                                                                                 |                                                                                                                   |
| <i>Affected</i>                                              | $P = .449$                                                                   | .324                                                                                                           | -                                                                                                               | -                                                                                                                 |
| <i>Unaffected</i>                                            | $P = .240$                                                                   | .056                                                                                                           | .180                                                                                                            | -                                                                                                                 |
| <i>Whole-brain</i>                                           | $P = .317$                                                                   | .153                                                                                                           | .371                                                                                                            | .741                                                                                                              |
| <b>WM Density</b>                                            |                                                                              |                                                                                                                |                                                                                                                 |                                                                                                                   |
| <i>Affected</i>                                              | $P = .879$                                                                   | .989                                                                                                           | -                                                                                                               | -                                                                                                                 |
| <i>Unaffected</i>                                            | $P = .434$                                                                   | .513                                                                                                           | .002                                                                                                            | -                                                                                                                 |
| <i>Whole-brain</i>                                           | $P = .533$                                                                   | .547                                                                                                           | .009                                                                                                            | .759                                                                                                              |

**Table S3.** Prediction performance based on a linear SVM classifier and rankSVM (see Methods section for details), respectively.

|                                                                                  | Linear SVM |      |      |     |  | Linear RankSVM                 |        |
|----------------------------------------------------------------------------------|------------|------|------|-----|--|--------------------------------|--------|
| Features                                                                         | ACC        | Sens | Spec | AUC |  | $\rho_{(predicted, observed)}$ | $pval$ |
| <b>Non-neural measures</b> (demographic variables, pre-CI SAT, and pre-CI SRI-Q) |            |      |      |     |  |                                |        |
|                                                                                  | 49%        | 60%  | 35%  | 49% |  | 0.03                           | 0.47   |
| <b>GM MVPS</b>                                                                   |            |      |      |     |  |                                |        |
| <i>affected</i>                                                                  | 59%        | 59%  | 59%  | 59% |  | -0.01                          | 0.526  |
| <i>unaffected</i>                                                                | 76%        | 71%  | 82%  | 79% |  | 0.49                           | 0.008  |
| <i>Whole-brain</i>                                                               | 76%        | 76%  | 76%  | 78% |  | 0.47                           | 0.014  |
| <b>WM MVPS</b>                                                                   |            |      |      |     |  |                                |        |
| <i>affected</i>                                                                  | 68%        | 65%  | 71%  | 73% |  | 0.42                           | 0.030  |
| <i>unaffected</i>                                                                | 76%        | 71%  | 82%  | 82% |  | 0.40                           | 0.034  |
| <i>Whole-brain</i>                                                               | 79%        | 76%  | 82%  | 83% |  | 0.47                           | 0.015  |
| <b>GM Density</b>                                                                |            |      |      |     |  |                                |        |
| <i>affected</i>                                                                  | 51%        | 60%  | 41%  | 51% |  | -0.15                          | 0.748  |
| <i>unaffected</i>                                                                | 57%        | 70%  | 41%  | 59% |  | -0.11                          | 0.672  |
| <i>Whole-brain</i>                                                               | 54%        | 65%  | 41%  | 58% |  | -0.11                          | 0.680  |
| <b>WM Density</b>                                                                |            |      |      |     |  |                                |        |
| <i>affected</i>                                                                  | 38%        | 41%  | 35%  | 35% |  | -0.26                          | 0.876  |
| <i>unaffected</i>                                                                | 51%        | 60%  | 41%  | 47% |  | -0.08                          | 0.622  |
| <i>Whole-brain</i>                                                               | 49%        | 55%  | 41%  | 44% |  | -0.22                          | 0.827  |

*Note.* For all brain models, nested template definition procedure with 10-fold cross-validation (see Methods section for details) was employed, in which different affected/unaffected voxels were selected for each cross-validated fold. Permutation and bootstrapping with 10,000 iterations was applied.  $\rho_{(predicted, observed)}$ , median Spearman's rank correlation between predicted and observed scores from the 10,000-iteration distribution derived from bootstrapping approach;  $pval$ ,  $p$ -value indicating statistical significance derived from a 10,000-iteration permutation test.

**Table S4.** Classification performance based on linear and nonlinear SVM classifiers. All non-neural measures (demographic variables, pre-CI SAT, and pre-CI SRI-Q) were included as features in the each model.

|                    | Linear SVM |      |      |     |  | Nonlinear SVM |      |      |     |
|--------------------|------------|------|------|-----|--|---------------|------|------|-----|
| Brain Measures     | ACC        | Sens | Spec | AUC |  | ACC           | Sens | Spec | AUC |
| <b>GM MVPS</b>     |            |      |      |     |  |               |      |      |     |
| <i>Affected</i>    | 32%        | 35%  | 29%  | 33% |  | 59%           | 70%  | 47%  | 58% |
| <i>Unaffected</i>  | 73%        | 75%  | 71%  | 76% |  | 68%           | 75%  | 59%  | 75% |
| <i>Whole-brain</i> | 73%        | 80%  | 65%  | 74% |  | 70%           | 80%  | 59%  | 68% |
| <b>WM MVPS</b>     |            |      |      |     |  |               |      |      |     |
| <i>Affected</i>    | 65%        | 75%  | 53%  | 70% |  | 64%           | 61%  | 67%  | 65% |
| <i>Unaffected</i>  | 76%        | 75%  | 76%  | 83% |  | 73%           | 75%  | 71%  | 80% |
| <i>Whole-brain</i> | 70%        | 80%  | 59%  | 83% |  | 68%           | 75%  | 59%  | 76% |
|                    |            |      |      |     |  |               |      |      |     |
| <b>GM Density</b>  |            |      |      |     |  |               |      |      |     |
| <i>Affected</i>    | 49%        | 55%  | 41%  | 51% |  | 49%           | 90%  | 0%   | 41% |
| <i>Unaffected</i>  | 57%        | 70%  | 41%  | 57% |  | 54%           | 100% | 0%   | 31% |
| <i>Whole-brain</i> | 54%        | 70%  | 35%  | 56% |  | 54%           | 100% | 0%   | 33% |
| <b>WM Density</b>  |            |      |      |     |  |               |      |      |     |
| <i>Affected</i>    | 43%        | 40%  | 47%  | 46% |  | 38%           | 70%  | 0%   | 30% |
| <i>Unaffected</i>  | 51%        | 60%  | 41%  | 44% |  | 46%           | 85%  | 0%   | 39% |
| <i>Whole-brain</i> | 43%        | 55%  | 29%  | 41% |  | 49%           | 90%  | 0%   | 27% |

**Table S5.** Classification performance based on a linear SVM classifier with different feature selection procedures. Two widely-used feature selection approaches were employed for verification because different feature selection procedures could filter out different voxels. We selected 5000 voxels (approximately 5% of a total number of voxels) that showed the most significant difference between the two groups (univariate two-sample *t*-tests or SVM-RFE weights) based on each fold of the training data set. As such, each trained model (affected, unaffected or whole-brain) for each LOOCV contained the same number of voxels. This procedure ruled out the potential confound introduced by using a different number of voxels in different models.

| Features           | Univariate feature selection |      |      |     | SVM-RFE feature selection |      |      |     |  |
|--------------------|------------------------------|------|------|-----|---------------------------|------|------|-----|--|
|                    | ACC                          | Sens | Spec | AUC | ACC                       | Sens | Spec | AUC |  |
| <b>GM MVPS</b>     |                              |      |      |     |                           |      |      |     |  |
| <i>affected</i>    | 46%                          | 50%  | 41%  | 51% | 49%                       | 55%  | 41%  | 50% |  |
| <i>unaffected</i>  | 68%                          | 75%  | 59%  | 76% | 70%                       | 80%  | 59%  | 75% |  |
| <i>Whole-brain</i> | 65%                          | 75%  | 53%  | 75% | 65%                       | 85%  | 41%  | 71% |  |
| <b>WM MVPS</b>     |                              |      |      |     |                           |      |      |     |  |
| <i>affected</i>    | 65%                          | 80%  | 47%  | 77% | 65%                       | 75%  | 53%  | 71% |  |
| <i>unaffected</i>  | 73%                          | 75%  | 71%  | 76% | 81%                       | 80%  | 82%  | 84% |  |
| <i>Whole-brain</i> | 65%                          | 70%  | 59%  | 76% | 84%                       | 80%  | 88%  | 84% |  |
| <b>GM Density</b>  |                              |      |      |     |                           |      |      |     |  |
| <i>affected</i>    | 59%                          | 65%  | 53%  | 61% | 57%                       | 60%  | 53%  | 61% |  |
| <i>unaffected</i>  | 51%                          | 60%  | 41%  | 56% | 70%                       | 80%  | 59%  | 65% |  |
| <i>Whole-brain</i> | 57%                          | 65%  | 47%  | 58% | 70%                       | 75%  | 65%  | 67% |  |
| <b>WM Density</b>  |                              |      |      |     |                           |      |      |     |  |
| <i>affected</i>    | 35%                          | 35%  | 35%  | 34% | 35%                       | 35%  | 35%  | 36% |  |
| <i>unaffected</i>  | 54%                          | 75%  | 29%  | 38% | 49%                       | 65%  | 29%  | 39% |  |
| <i>Whole-brain</i> | 43%                          | 50%  | 35%  | 35% | 46%                       | 60%  | 29%  | 33% |  |

**Table S6.** Brain regions in gray matter that contributed significantly to classifying children with CIs into high- vs. low-improvement sub-groups using the searchlight method.

| Regions                          | BA    | MNI coordinates |     |     | Peak classification accuracy | Cluster size (Number of voxels) |
|----------------------------------|-------|-----------------|-----|-----|------------------------------|---------------------------------|
|                                  |       | x               | y   | z   |                              |                                 |
| <b>GM MVPS</b>                   |       |                 |     |     |                              |                                 |
| L. Superior Frontal Gyrus        | 11    | -2              | 60  | -12 | 87.5%                        | 101                             |
| L. Superior Frontal Gyrus        | 9     | -18             | 46  | 34  | 95%                          | 122                             |
| L. Middle Frontal Gyrus          | 6/9   | -38             | 12  | 42  | 90%                          | 340                             |
| L. Inferior/Middle Frontal Gyrus | 10/46 | -36             | 38  | 18  | 87.5%                        | 138                             |
| L. Thalamus                      | -     | -12             | -32 | 10  | 90%                          | 103                             |
| L. Cerebellum                    | -     | -14             | -42 | -54 | 90%                          | 406                             |
| R. Superior Frontal Gyrus        | 6     | 38              | -8  | 62  | 92.5%                        | 273                             |
| R. Middle Frontal Gyrus          | 10/46 | 38              | 52  | 2   | 90%                          | 295                             |
| R. Inferior Frontal Gyrus        | 45/47 | 54              | 30  | 6   | 87.5%                        | 144                             |
| R. Middle Temporal Gyrus         | 21/38 | 58              | 6   | -16 | 90%                          | 125                             |
| R. Cuneus                        | 18    | 0               | -70 | 4   | 90%                          | 121                             |
| R. Middle Occipital Gyrus        | 19    | 38              | -76 | 30  | 90%                          | 167                             |
| R. Cerebellum                    | -     | 30              | -44 | -32 | 90%                          | 439                             |
| <b>GM Density</b>                |       |                 |     |     |                              |                                 |
| L. Middle Frontal Gyrus          | 10    | -32             | 60  | 0   | 80%                          | 228                             |
| L. Middle Frontal Gyrus          | 8     | -26             | 18  | 46  | 82.5                         | 168                             |
| L. Superior Temporal Gyrus       | 22/6  | -50             | -10 | 8   | 85%                          | 162                             |
| L. Inferior Parietal Lobule      | 40    | -54             | -44 | 48  | 82.5%                        | 199                             |
| L. Middle Occipital Gyrus        | 18    | -22             | -98 | -8  | 90%                          | 273                             |
| L. Cerebellum                    | -     | -12             | -76 | -28 | 87.5%                        | 439                             |
| R. Superior Temporal Gyrus       | 22    | 50              | 2   | -6  | 82.5%                        | 156                             |
| R. Middle Cingulate Gyrus        | 31    | 12              | -44 | 50  | 87.5%                        | 151                             |
| R. Cerebellum                    | -     | 20              | -44 | -58 | 85%                          | 409                             |

Note. The coordinate was extracted based on the centroid of each contiguous mass. BA, Brodmann's Area

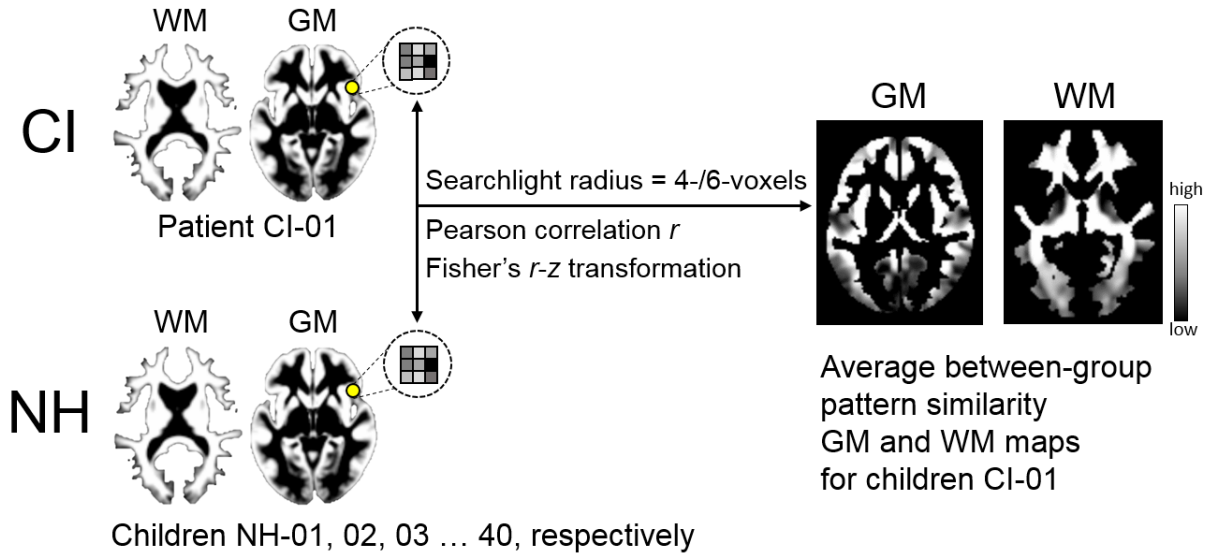

**Fig. S1.** Between-group searchlight multi-voxel pattern similarity (MVPS) analysis pipeline. “NH-01, 02...” indicates labels of children in the NH group; “CI-01, 02...” indicates labels of children in the CI group. The same procedure was conducted for generating within-NH-group pattern similarity maps (see Methods section for details).



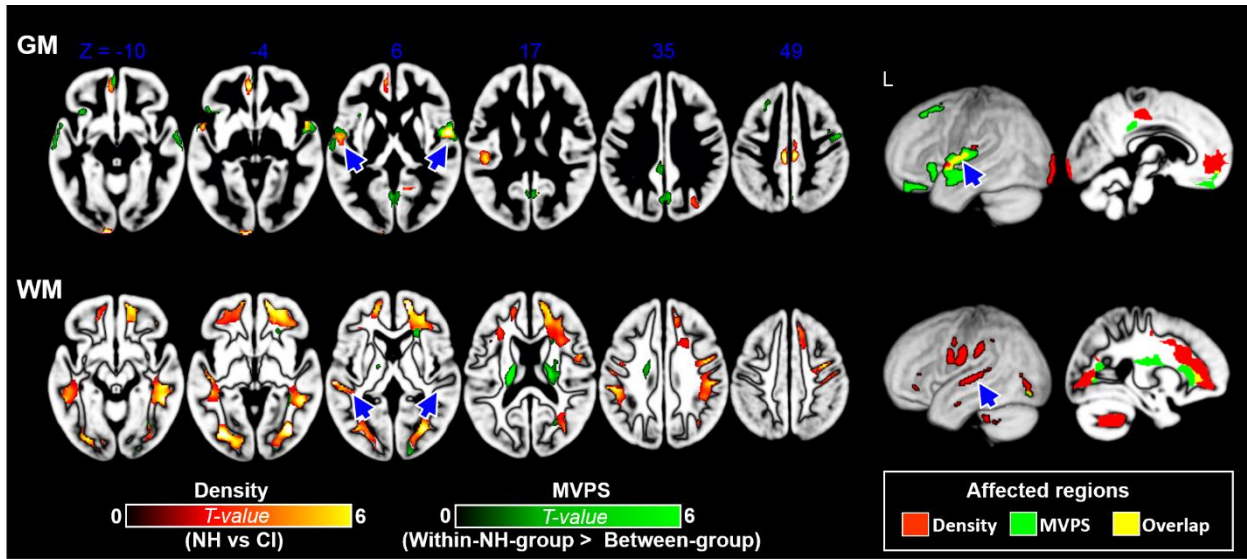

**Fig. S2.** Group comparisons in density and MVPS without controlling for demographic variables. The pattern of results is largely consistent with Fig. 1. GM = gray matter; WM = white matter.

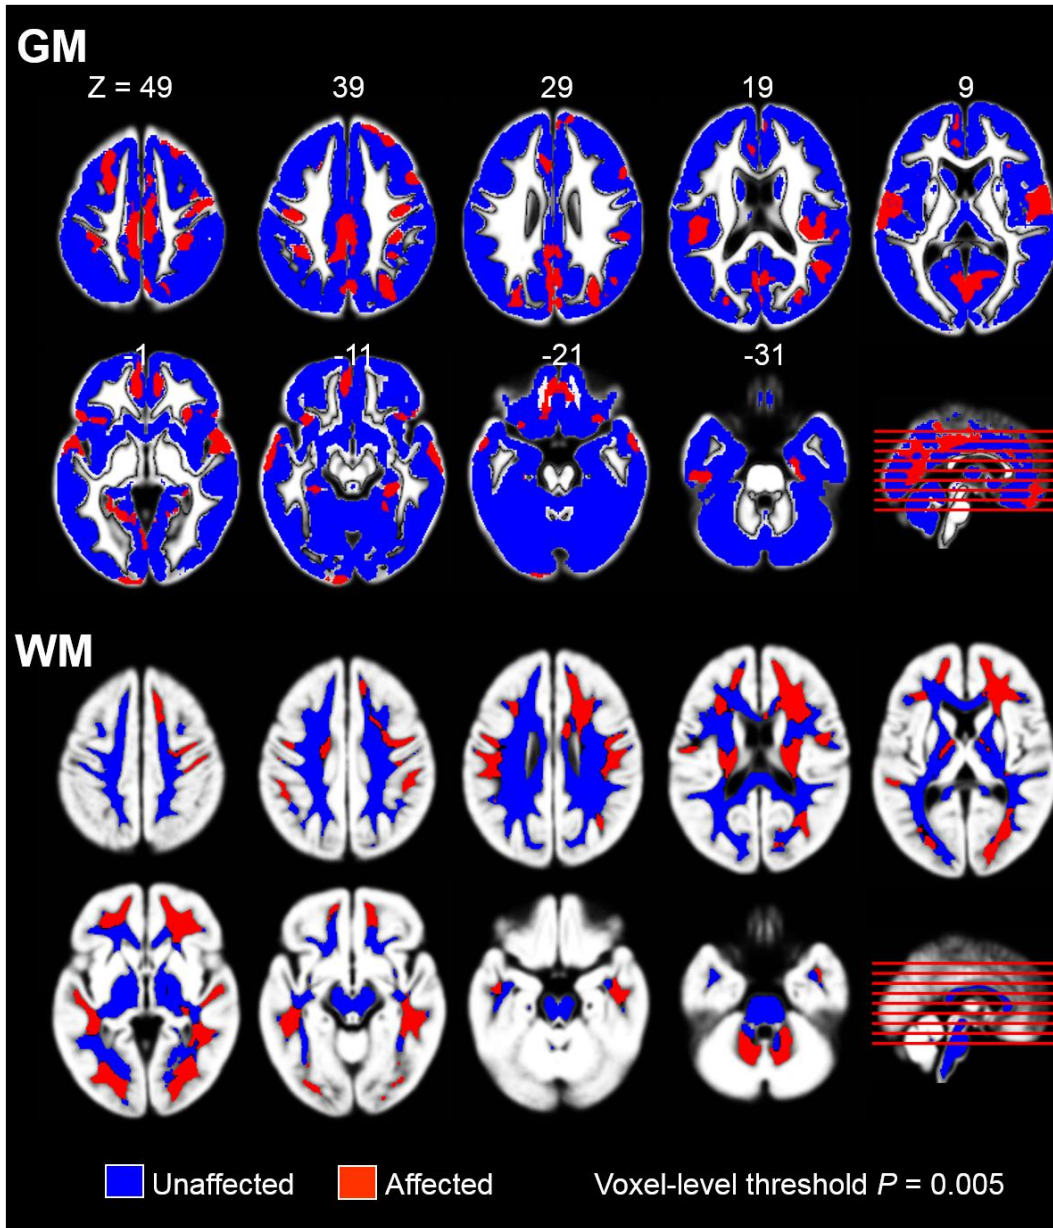

**Fig. S3.** Affected versus unaffected gray-matter (upper panel) and white-matter regions (lower panel). A less conservative threshold (uncorrected voxel-level threshold  $P = 0.005$ ) was employed to visualize regions that are potentially different between children in the CI and NH groups.

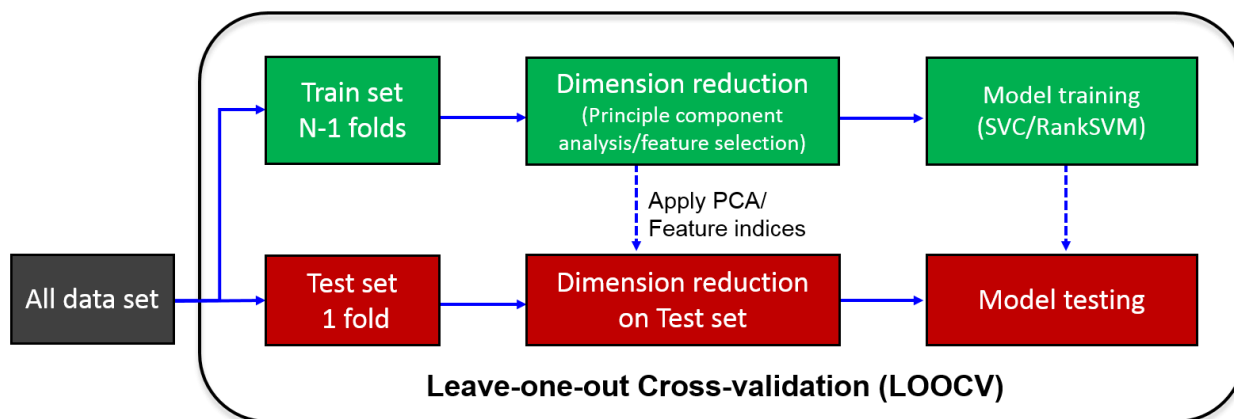

**Fig. S4.** Three-level nested leave-one-out cross-validation (LOOCV) procedures. Two machine learning algorithms (SVM for Classification [SVC] and RankSVM) were used to verify our findings.

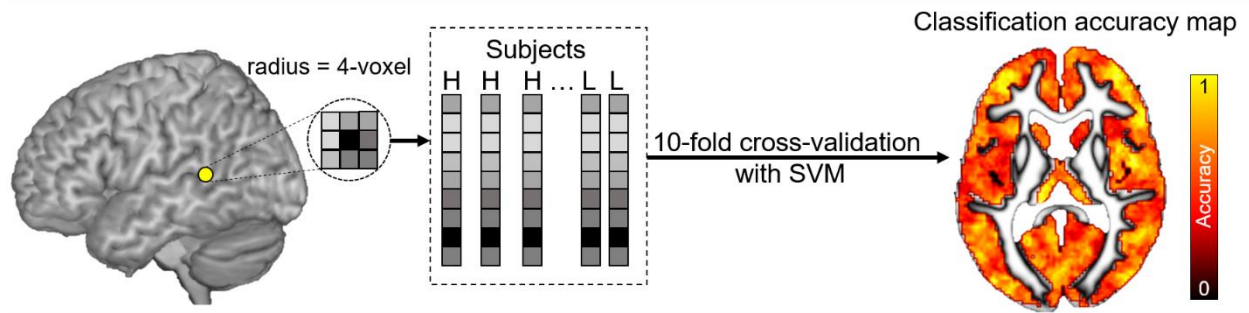

**Fig. S5.** Whole-brain searchlight outcome-group classification procedure. A balanced 10-fold cross-validation procedure with a linear SVM classifier was employed and used to determine the classification accuracy for each sphere. H = high-improvement child; L = low-improvement child.

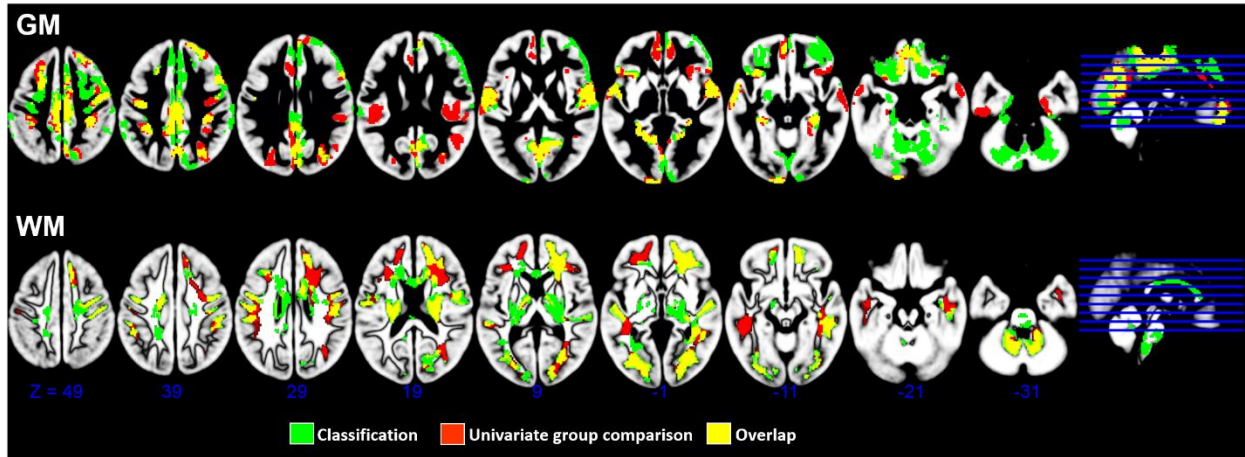

**Fig. S6.** Brain regions that are distinct between children in the CI and NH groups based on multivariate classification analysis (green) with 10-fold cross-validation and univariate two-sample *t*-tests (red), respectively. Overlapping regions are in yellow. A large proportion of brain areas in both tissue types (GM and WM) overlapped across the two approaches.
